# Supplementary material for: Endomucin prevents leukocyte–endothelial cell adhesion and has a critical role under resting and inflammatory conditions
Source: PubMed Central journal article supplement (PMC4740757; doi:10.1038/ncomms10363), 2016-02-02

## Supplementary Figure 1

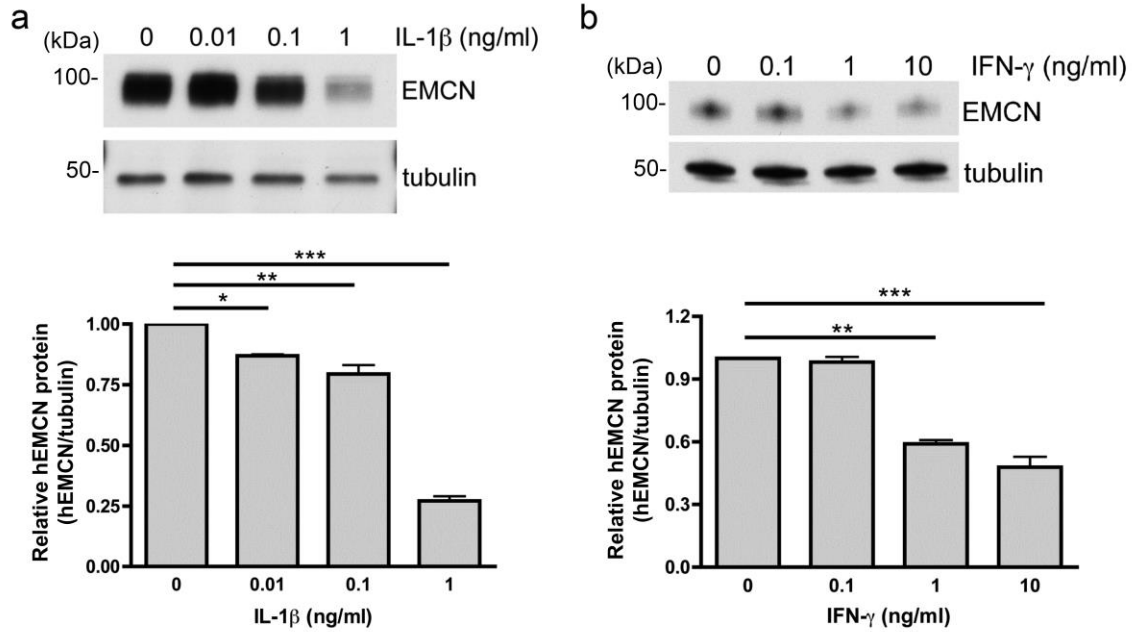

**Supplementary Figure 1. IL-1 $\beta$  and IFN- $\gamma$  treatment leads to dose-dependent reduction in EMCN total protein levels.** Total cell lysates were harvested from HUVEC following 24 hr treatment with IL-1 $\beta$  (0.01-1 ng/ml) or IFN- $\gamma$  (0.1-10 ng/ml). EMCN levels were evaluated by western blot. A dose-dependent reduction of EMCN protein was observed with IL-1 $\beta$  (a) and IFN- $\gamma$  (b). Results are displayed as mean  $\pm$  SEM (N=3). Significance was determined using one-way ANOVA with Tukey's post-hoc test. \* $p$ <0.05, \*\* $p$ <0.01, \*\*\* $p$ <0.001.

## Supplementary Figure 2

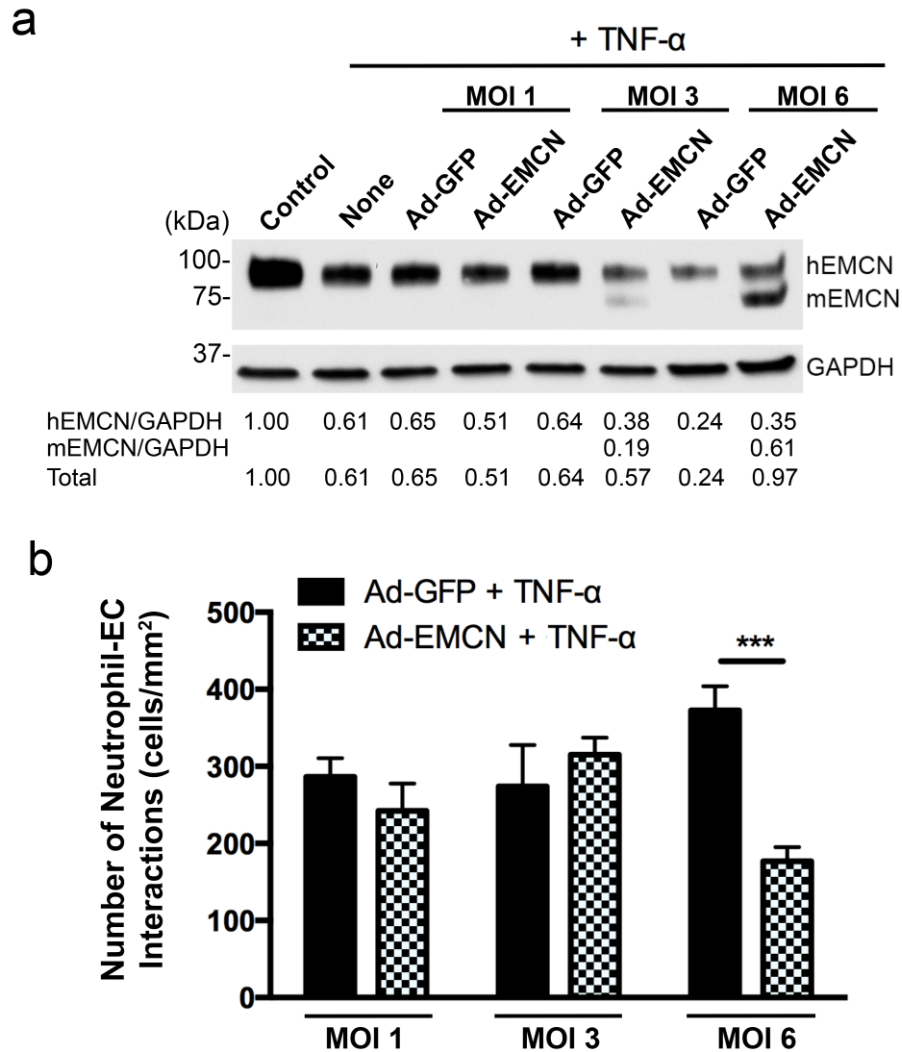

**Supplementary Figure 2. Overexpression of EMCN at MOI 6 suppresses TNF- $\alpha$ -induced neutrophil interactions.** HUVEC were transduced with Ad-GFP or Ad-EMCN using different MOI (0, 1, 3, 6) and treated with TNF- $\alpha$ . **(a)** Total cell lysates were harvested 24 hr after TNF- $\alpha$  treatment. Protein levels of endogenous hEMCN, mEMCN, and GAPDH loading control were determined by western blot and analyzed using ImageJ. This representative blot shows dose-dependent overexpression of mEMCN with increased MOI. The level of total EMCN, including hEMCN and mEMCN, at MOI 6 is comparable to untreated control. **(b)** Flow adhesion assay was performed on HUVEC from parallel plates using freshly isolated neutrophils under 0.5 dynes/cm<sup>2</sup> shear stress. At MOI 6 but not at MOI 1 and 3, Ad-EMCN suppressed TNF- $\alpha$ -induced neutrophil interactions compared to Ad-GFP control at the same MOI. Data in **(b)** are expressed as mean  $\pm$  SEM. Significance was determined using one-way ANOVA followed by Newman-Keuls post-hoc test. \*\*\* $p$ <0.001.

### Supplementary Figure 3

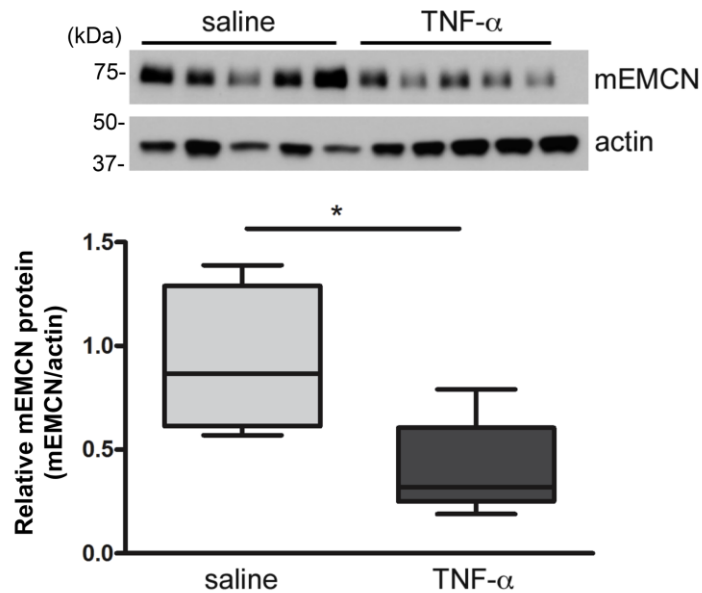

**Supplementary Figure 3. Reduction of EMCN expression in the ciliary body 48 hr following TNF- $\alpha$  injection.** Ciliary bodies were harvested 48 hr after intravitreal injection of TNF- $\alpha$  (10 ng/1 $\mu$ l) for western blot analysis of mEMCN and actin (as loading control). TNF- $\alpha$  led to significant reduction of EMCN in the ciliary body compared to saline-injected controls. Results are displayed as mean  $\pm$  SEM (N=4-5). Significance was determined using the Student's t-test. \* $p$ <0.05.

## Supplementary Figure 4

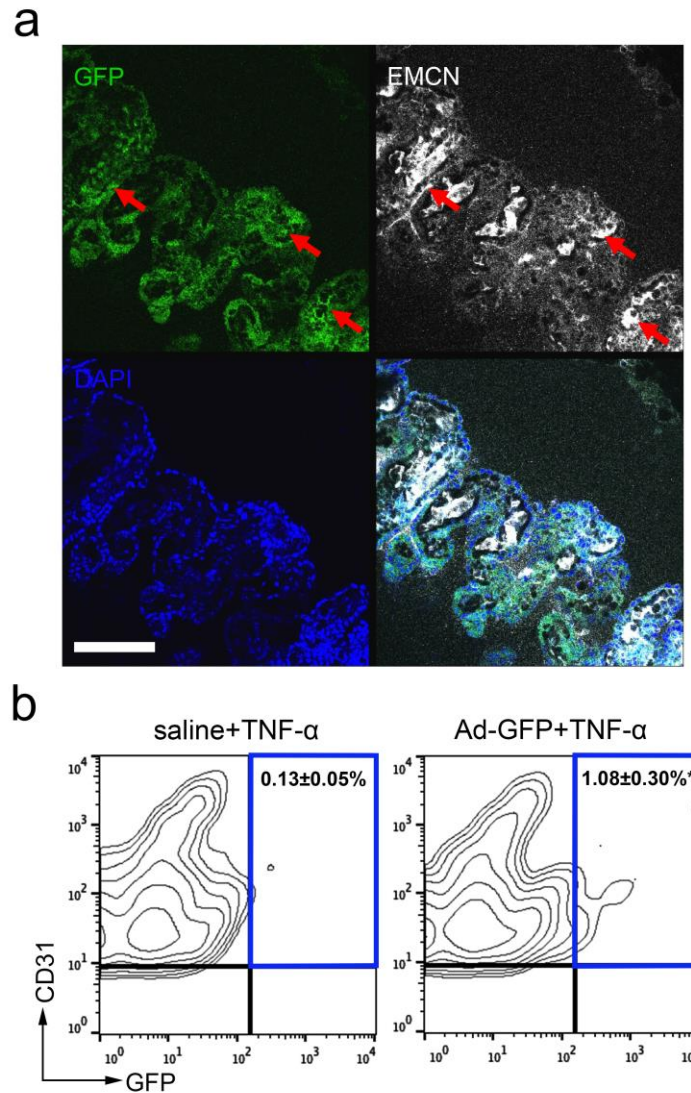

**Supplementary Figure 4. Intravitreal injection allows adenoviral delivery in the mouse ciliary body.** (a) Anterior segments of the mouse eye, containing the ciliary body, were harvested 8 days post Ad-GFP injection, flat mounted onto a coverglass, and fixed in 4% PFA. Confocal microscopy images show the ciliary body stained with vascular endothelial cell marker (EMCN) and GFP-expressing endothelial cells, denoted by red arrows. The scale bar represents 100  $\mu$ m. (b) Mice received an intravitreal injection of Ad-GFP or saline injection, and 7 days later, a second intravitreal injection of TNF- $\alpha$  (10 ng/1 $\mu$ l). After 24 hr, cells from the ciliary body were harvested for CD31 staining and flow cytometry analysis. An initial gate was used to identify all CD31+ cells in the CB; the blue gate displays double positive cells within the CD31+ population. A representative contour plot is shown, with the frequency of double positive cells displayed as mean  $\pm$  SEM (N=5-6). There was a significant increase in the percentage of GFP+ cells in the endothelium of CB from Ad-GFP-injected eyes compared to saline-injected controls. Significance was determined using the Student's t-test. \*p<0.05.

## Supplementary Figure 5

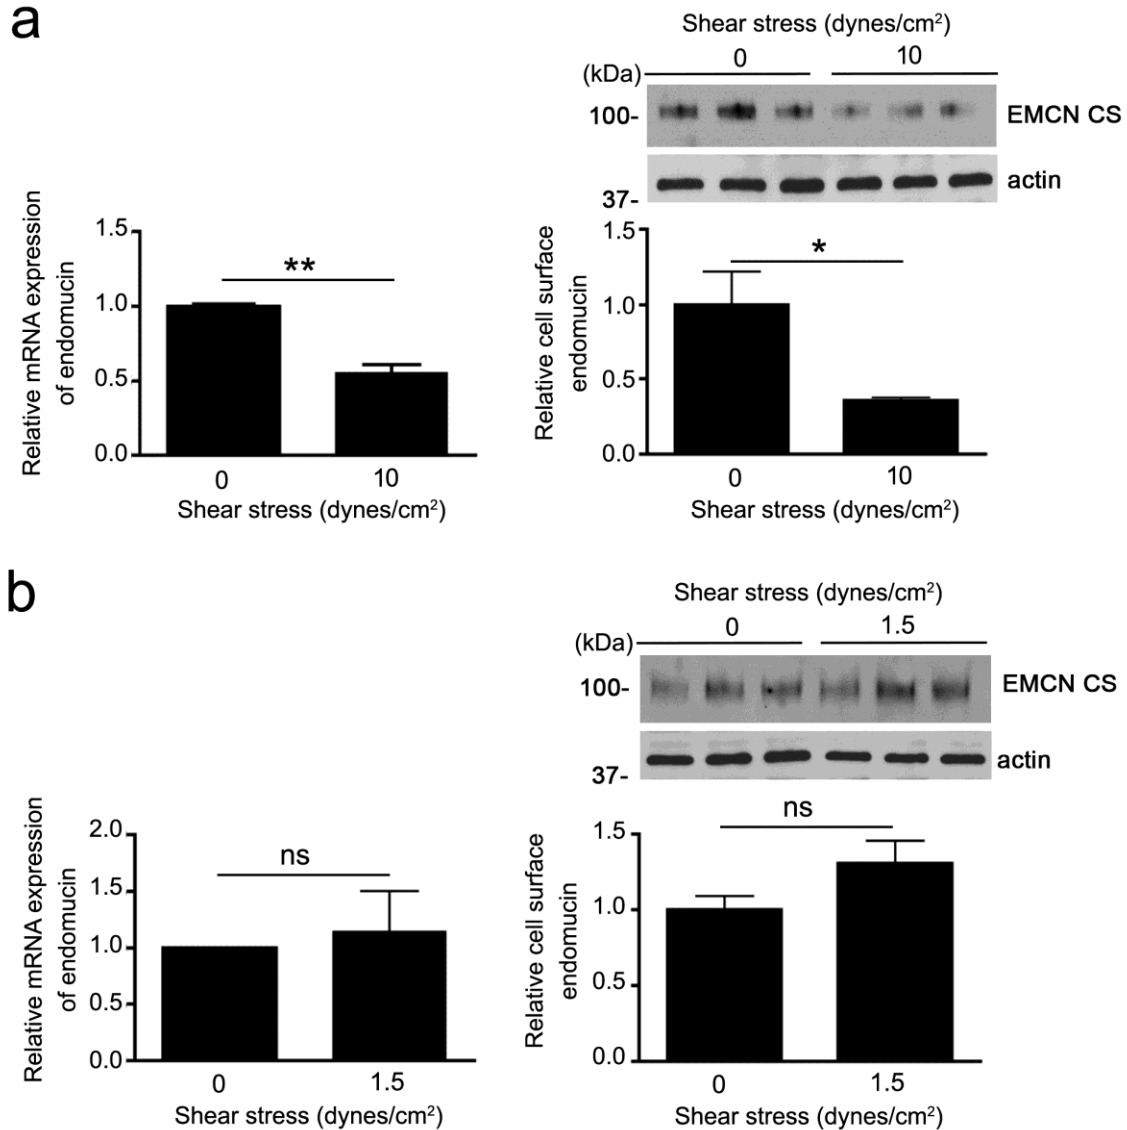

**Supplementary Figure 5. High shear stress downregulates expression and surface localization of EMCN in HUVEC.** HUVEC were placed on an orbital shaker and exposed to shear stress for 24 hr. **(a)** High shear stress (10 dynes/cm<sup>2</sup>) downregulated EMCN compared to static conditions (0 dynes/cm<sup>2</sup>) as determined by qRT-PCR and western blot analysis of biotinylated proteins. **(b)** Venular-like shear stress of 1.5 dynes/cm<sup>2</sup> had no effect on EMCN mRNA and cell surface protein levels. Results are displayed as mean  $\pm$  SEM (N=3). Significance was determined using the Student's t-test. \* $p$ <0.05; \*\* $p$ <0.01. ns, non-significant. CS, cell surface.

# Supplementary Figure 6

Fig. 2a

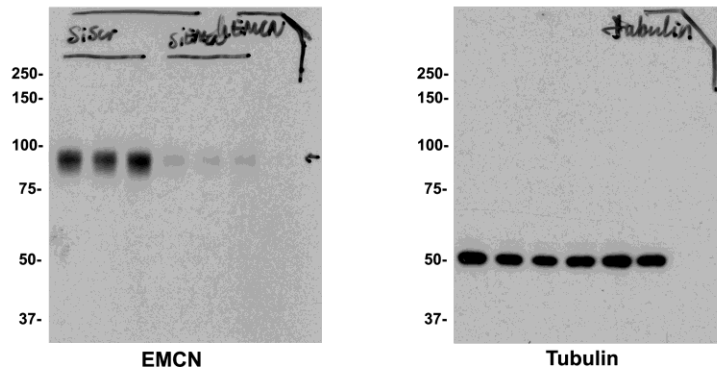

Fig. 3b

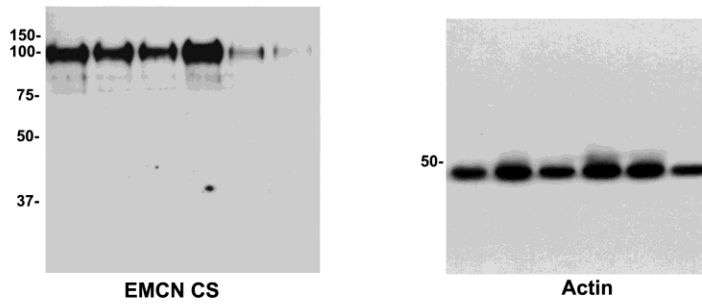

Fig. 4a

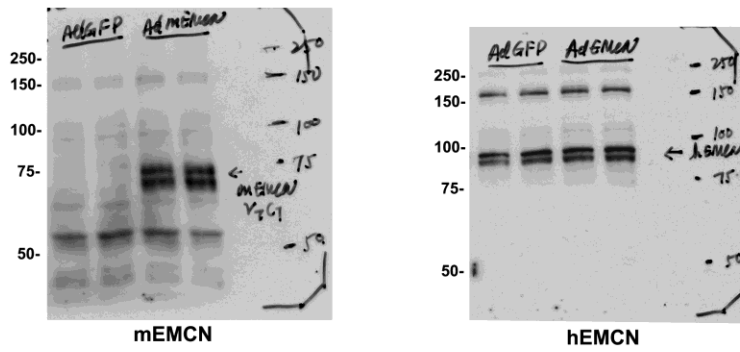

Fig. 5b

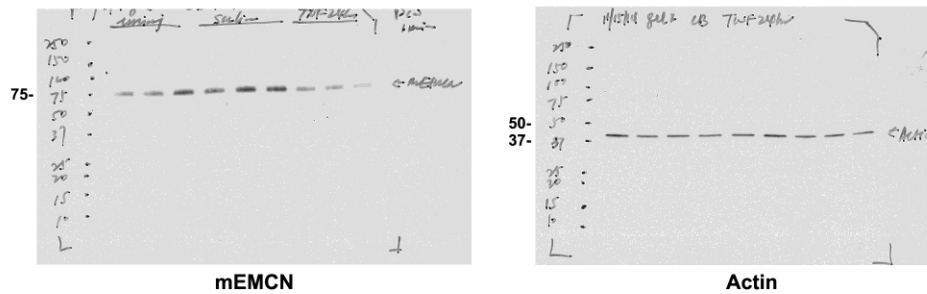

Supplementary Figure 6. Full scans of uncropped immunoblots.

Supp Fig. 1a

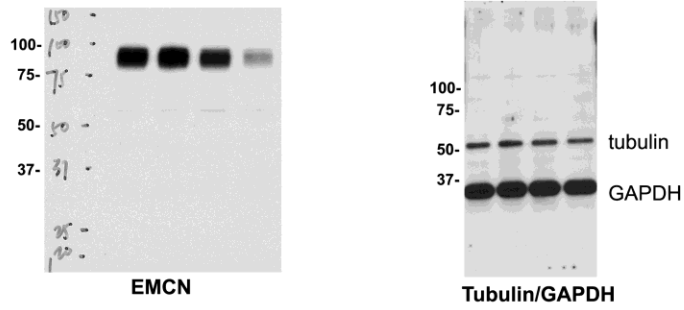

Supp Fig. 1b

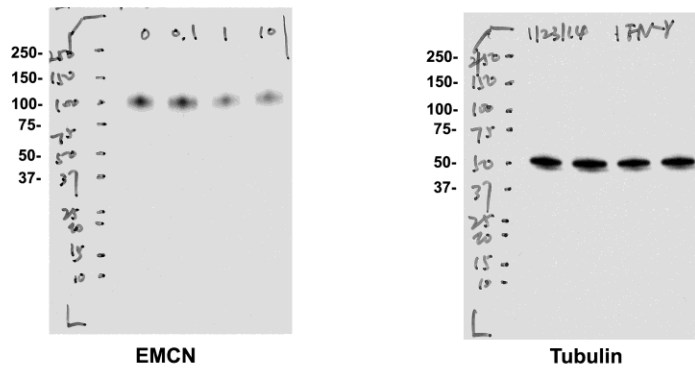

Supp Fig. 2a

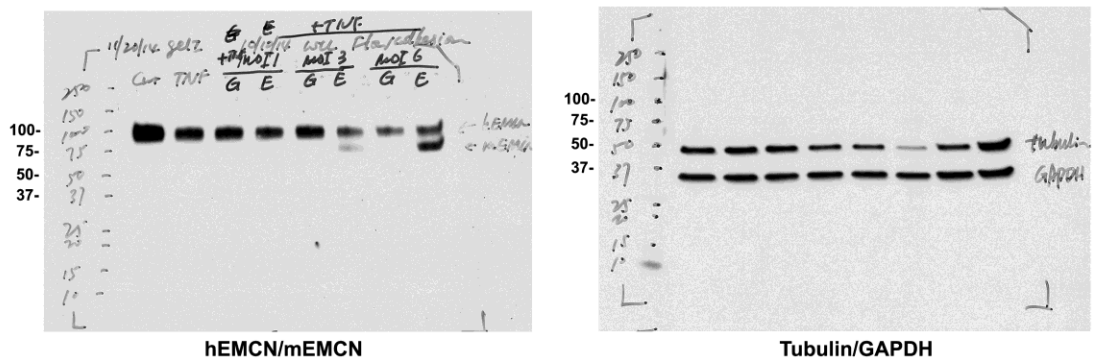

Supplementary Figure 6 – continued

Supp Fig. 3

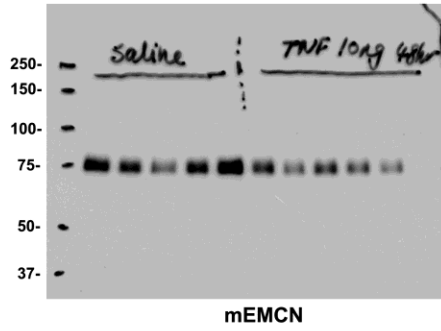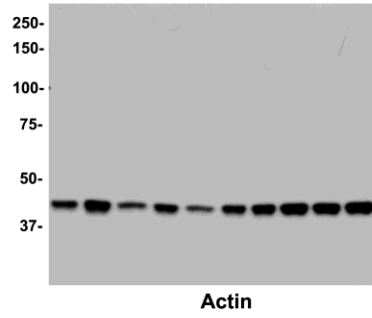

Supp Fig. 5a

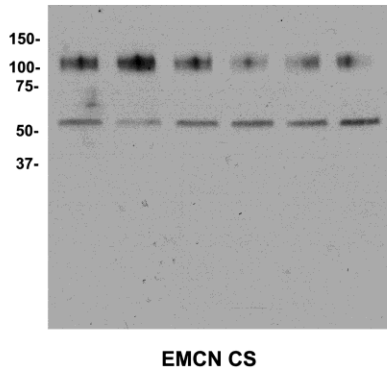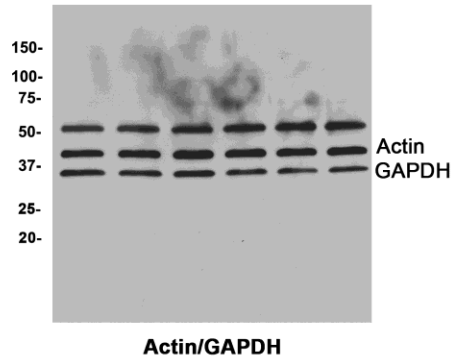

Supp Fig. 5b

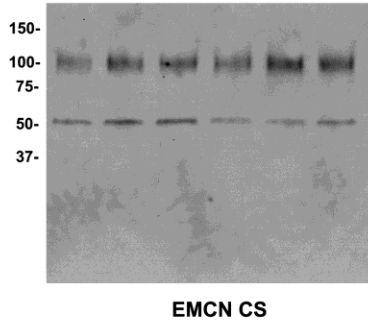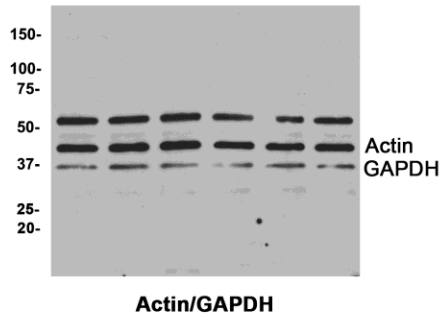

Supplement: ncomms10363-s1.pdf [file ncomms10363-s1.pdf]
